# Supplementary material
Source: publisher figshare collection journal article supplement (https://tandf.figshare.com/ndownloader/files/21298314)
Supplement: Supplementary file 1 [file 21298314]

**Identification and quantification of surfactin, a non–volatile lipopeptide in Moutai liquor**

**Supplementary Information**

**Zongxiao Chen,1 Qun Wu,3* Li Wang,2 Shuang Chen,3 Lin Lin,1 Heyu Wang1 & Yan Xu3**

1 Kweichow Moutai Co., Ltd, Renhuai, Guizhou 564501, China.

2 Kweichow Moutai Group, Renhuai, Guizhou 564501, China.

3 State Key Laboratory of Food Science and Technology, Synergetic Innovation Center of Food Safety and Nutrition, Key Laboratory of Industrial Biotechnology of Ministry of Education, School of Biotechnology, Jiangnan University, Wuxi, Jiangsu 214122, China.

The work was carried out in Technique Center of Kweichow Moutai Co., Ltd., Renhuai, Guizhou, China and School of Biotechnology, Jiangnan University, Wuxi, Jiangsu, China.

*** Correspondence to**: Qun Wu, State Key Laboratory of Food Science and Technology, Synergetic Innovation Center of Food Safety and Nutrition, Key Laboratory of Industrial Biotechnology of Ministry of Education, School of Biotechnology, Jiangnan University, Wuxi, Jiangsu 214122, China.

E–mail address: [wuq@jiangnan.edu.cn](mailto:yxu@jiangnan.edu.cn).

**Summary**

The supplementary information includes two figures and three tables.


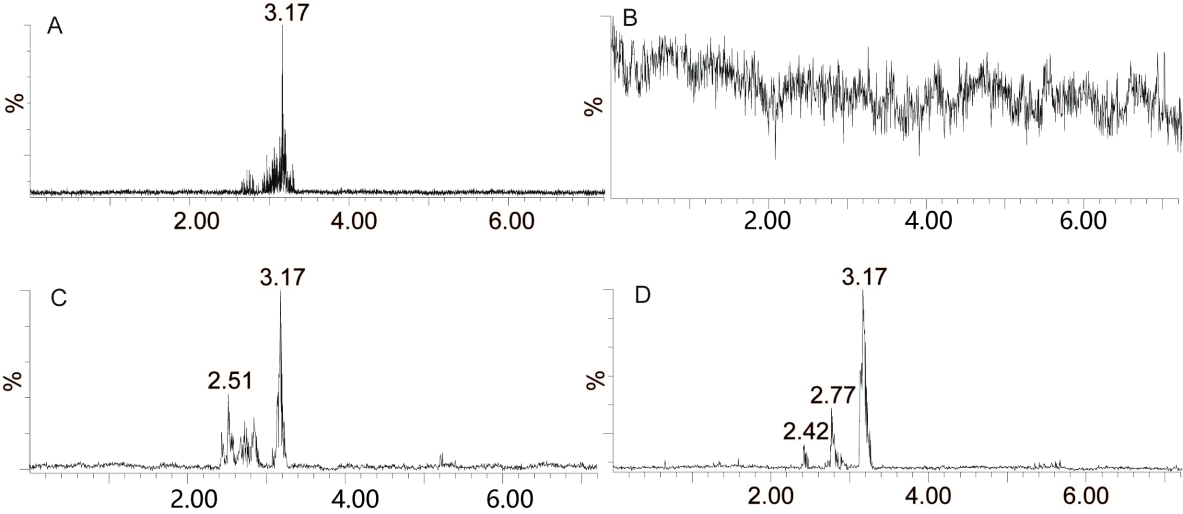


**Figure S1.** Determination of surfactin in Moutai liquor with different pretreatments by UPLC/MS. A: Total ion chromatogram (TIC) of surfactin standard (0.5 μg L–1), B: TIC of liquor sample without pretreatment, C and D: TIC of liquor sample pre–treated with SPE procedure which was washed with 10 mL10% and 70% methanol respectively.


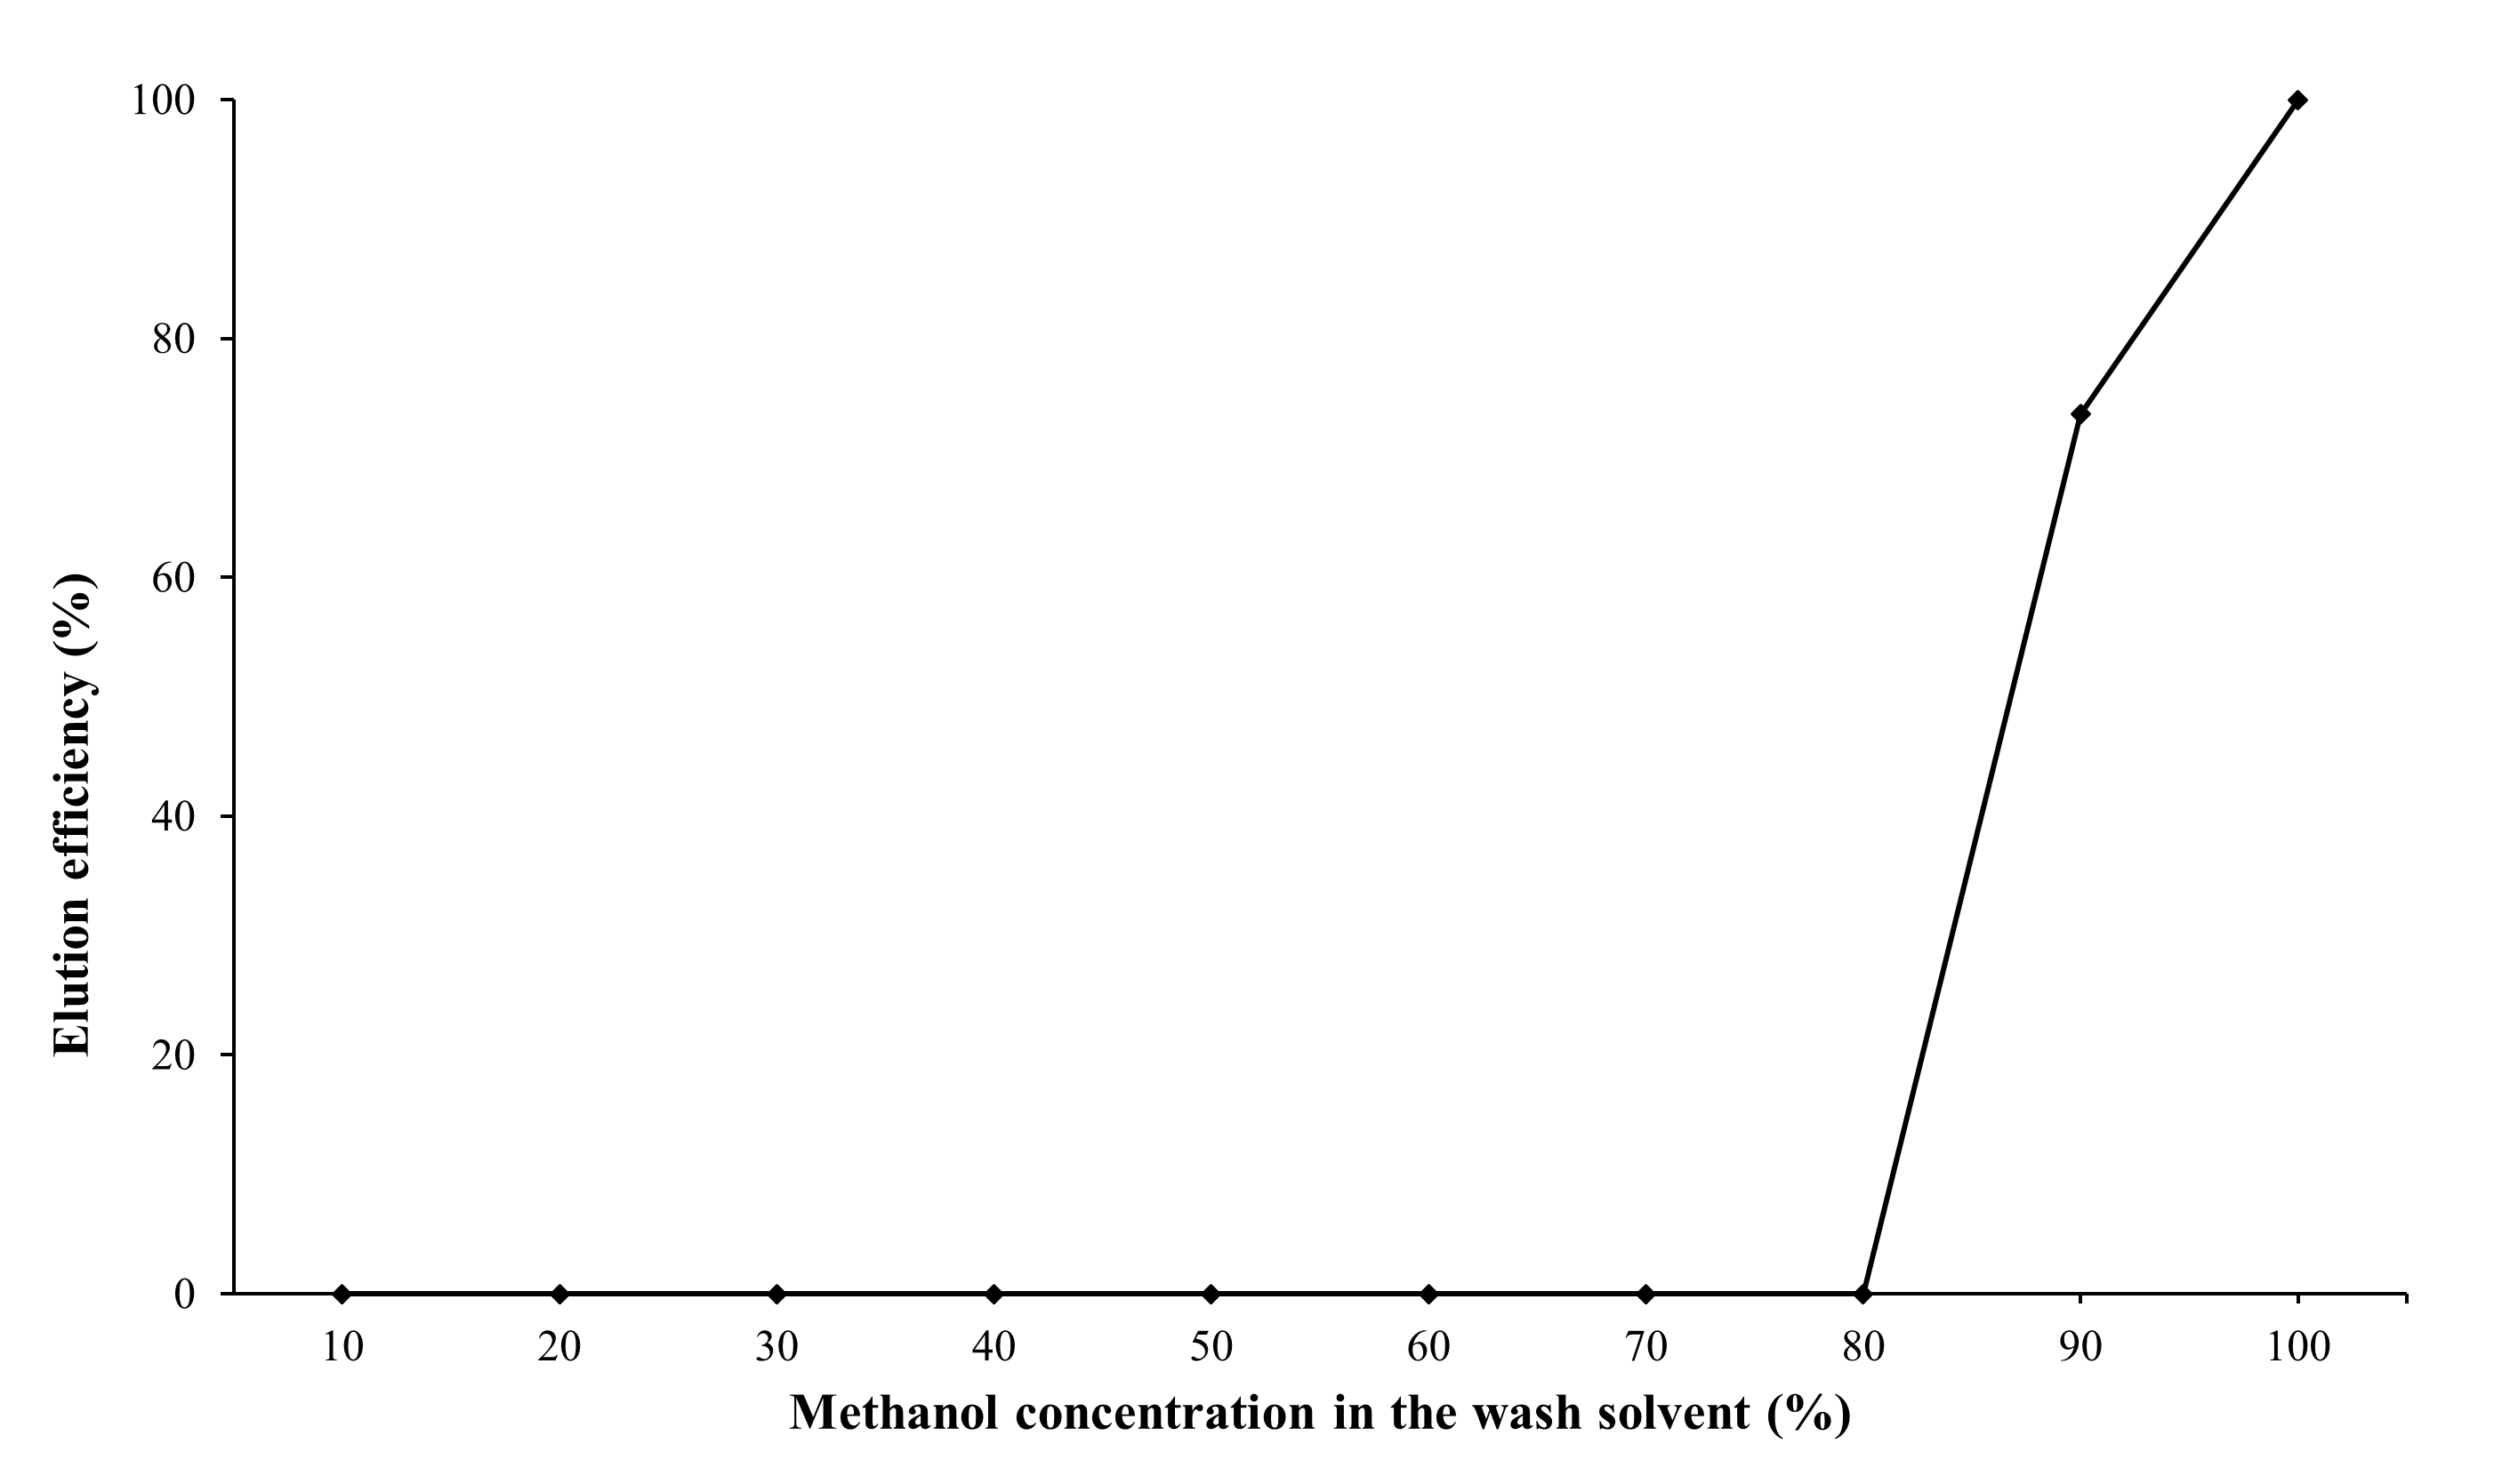


**Figure S2.** The elution efficiency of different contents of methanol.

**Table S1** The information of primers.

| **Primer** | **Sequences (5’-3’)** | **Primer size** |
| --- | --- | --- |
| 27F | AGAGTTTGATCCTGGCTCA | 19 bp |
| 1492R | GGTTACCTTGTTACGACTT | 19 bp |

**Table S2** Concentrations of surfactin (μg L–1) in Moutai liquor.

| **Sample no.** | **Brand** | **Alcohol content (vol%)** | **Time (years)** | **Storage time (years)** | **Total surfactina**  **(μg L–1)** | **RSDb (%)** |
| --- | --- | --- | --- | --- | --- | --- |
| 1 | Kweichow Moutai | 53 | 2014 | 5 | 0.10 | 0.97 |
| 2 | 53 | 2015 | 4 | 0.03 | 2.57 |
| 3 | 53 | 2015 | 4 | 0.03 | 3.12 |
| 4 | 53 | 2015 | 4 | 0.04 | 3.27 |
| 5 | 53 | 2015 | 4 | 0.09 | 1.76 |
| 6 | 53 | 2015 | 4 | 0.07 | 1.98 |
| 7 | 53 | 2015 | 4 | 0.05 | 4.20 |
| 8 | 53 | 2015 | 4 | 0.02 | 5.18 |
| 9 | 53 | 2016 | 3 | 0.06 | 4.60 |
| 10 | 53 | 2016 | 3 | 0.06 | 4.15 |
| 11 | 53 | 2016 | 3 | 0.31 | 3.44 |
| 12 | 53 | 2016 | 3 | 0.07 | 2.88 |
| 13 | 53 | 2016 | 3 | 0.13 | 5.06 |
| 14 | 53 | 2016 | 3 | 0.08 | 2.78 |
| 15 | 53 | 2016 | 3 | 0.16 | 2.08 |
| 16 | 53 | 2016 | 3 | 0.07 | 1.89 |
| 17 | 53 | 2016 | 3 | 0.10 | 3.32 |
| 18 | 53 | 2017 | 2 | 0.18 | 3.66 |
| 19 | 53 | 2017 | 2 | 0.21 | 4.68 |
| 20 | 53 | 2017 | 2 | 0.07 | 5.49 |
| 21 | 53 | 2017 | 2 | 0.13 | 4.02 |
| 22 | 53 | 2017 | 2 | 0.36 | 2.24 |
| 23 | 53 | 2017 | 2 | 0.17 | 2.90 |
| 24 | 53 | 2017 | 2 | 0.14 | 2.66 |
| 25 | 53 | 2017 | 2 | 0.10 | 3.10 |
| 26 | 53 | 2017 | 2 | 0.12 | 3.52 |
| 27 | 53 | 2017 | 2 | 0.08 | 5.98 |

aResults were given as averages of three replicates

bRelative standard deviation (RSD) = standard deviation/mean, n = 3.

**Table S3** GenBank accession numbers for 16s rRNA sequences.

| **Label** | **Strain** | **GenBank accession number** |
| --- | --- | --- |
| MT1 | *Bacillus subtilis* | MN809374 |
| MT2 | *Bacillus subtilis* | MN809375 |
| MT3 | *Bacillus subtilis* | MN809376 |
| MT4 | *Bacillus subtilis* | MN809377 |
| MT5 | *Bacillus amyloliquefaciens* | MN809378 |
